# Supplementary figures and images for: LRG1 Promotes Metastatic Dissemination of Melanoma through Regulating EGFR/STAT3 Signalling
Source: MDPI journal article supplement (doi:10.3390/cancers13133279), 2021-06-30

Figure 5A

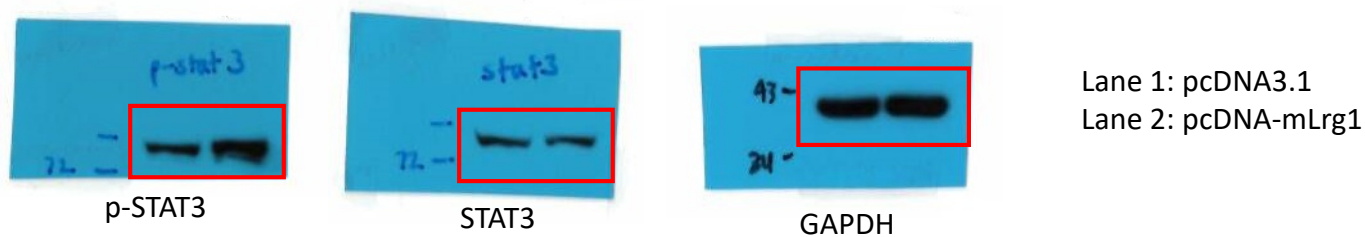

Figure 5B

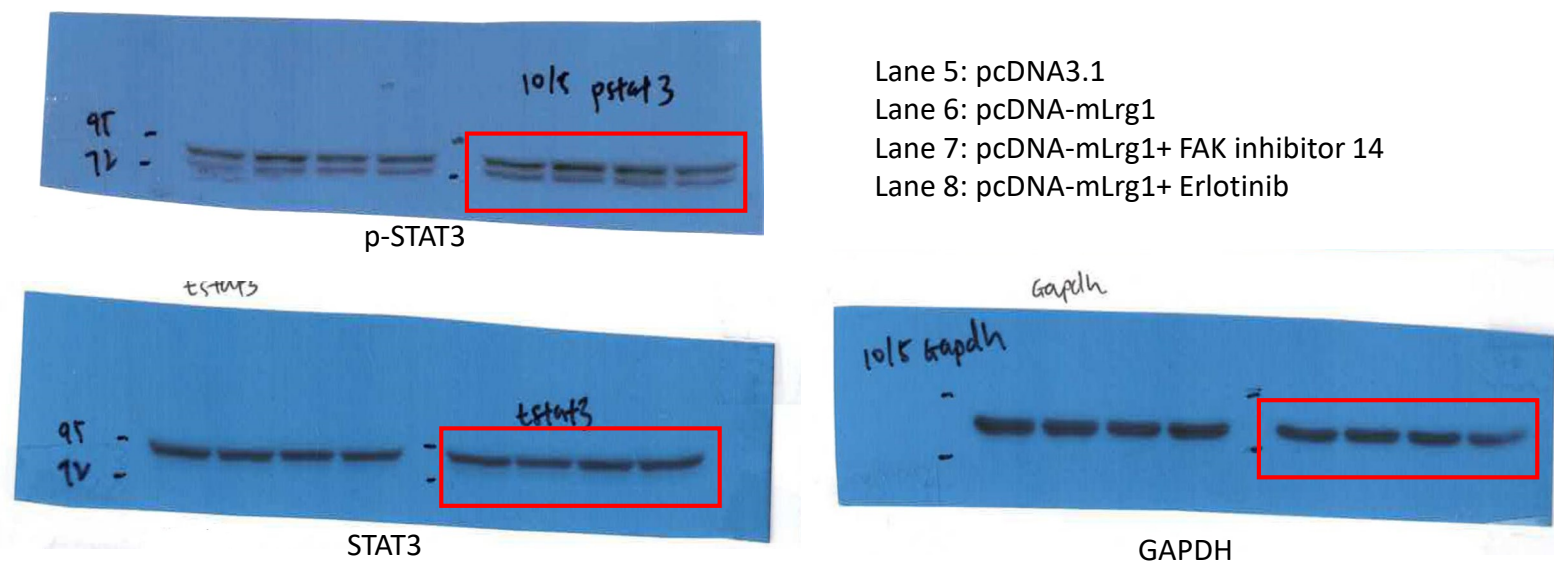

Figure 5C

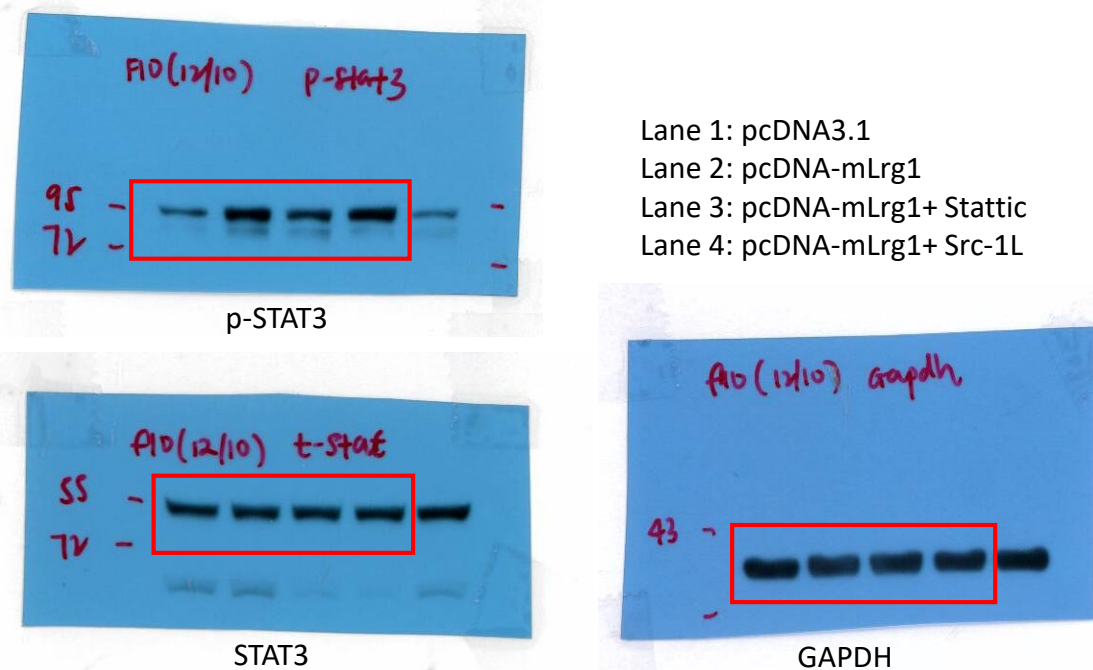

Supplement: s1 [file s1]
